# Diverse Small Molecule Inhibitors of Human Apurinic/Apyrimidinic Endonuclease APE1 Identified from a Screen of a Large Public Collection

Dorjbal Dorjsuren<sup>1</sup>, Daemyung Kim<sup>3</sup>, Vaddadi N. Vyjayanti<sup>2</sup>, David J. Maloney<sup>1</sup>, Ajit Jadhav<sup>1</sup>, David M. Wilson III<sup>2\*</sup>, Anton Simeonov<sup>1\*</sup>

**1** NIH Chemical Genomics Center, National Center for Advancing Translational Sciences, National Institutes of Health, Bethesda, Maryland, United States of America, **2** Laboratory of Molecular Gerontology, National Institute on Aging, National Institutes of Health, Baltimore, Maryland, United States of America, **3** Department of Genetic Engineering, Cheongju University, Cheongju, Republic of Korea

## Abstract

The major human apurinic/aprimidinic endonuclease APE1 plays a pivotal role in the repair of base damage via participation in the DNA base excision repair (BER) pathway. Increased activity of APE1, often observed in tumor cells, is thought to contribute to resistance to various anticancer drugs, whereas down-regulation of APE1 sensitizes cells to DNA damaging agents. Thus, inhibiting APE1 repair endonuclease function in cancer cells is considered a promising strategy to overcome therapeutic agent resistance. Despite ongoing efforts, inhibitors of APE1 with adequate drug-like properties have yet to be discovered. Using a kinetic fluorescence assay, we conducted a fully-automated high-throughput screen (HTS) of the NIH Molecular Libraries Small Molecule Repository (MLSMR), as well as additional public collections, with each compound tested as a 7-concentration series in a 4  $\mu$ L reaction volume. Actives identified from the screen were subjected to a panel of confirmatory and counterscreen tests. Several active molecules were identified that inhibited APE1 in two independent assay formats and exhibited potentiation of the genotoxic effect of methyl methanesulfonate with a concomitant increase in AP sites, a hallmark of intracellular APE1 inhibition; a number of these chemotypes could be good starting points for further medicinal chemistry optimization. To our knowledge, this represents the largest-scale HTS to identify inhibitors of APE1, and provides a key first step in the development of novel agents targeting BER for cancer treatment.

**Citation:** Dorjsuren D, Kim D, Vyjayanti VN, Maloney DJ, Jadhav A, et al. (2012) Diverse Small Molecule Inhibitors of Human Apurinic/Apyrimidinic Endonuclease APE1 Identified from a Screen of a Large Public Collection. PLoS ONE 7(10): e47974. doi:10.1371/journal.pone.0047974

**Editor:** Gayle E. Woloschak, Northwestern University Feinberg School of Medicine, United States of America

**Received:** May 2, 2012; **Accepted:** September 25, 2012; **Published:** October 23, 2012

This is an open-access article, free of all copyright, and may be freely reproduced, distributed, transmitted, modified, built upon, or otherwise used by anyone for any lawful purpose. The work is made available under the Creative Commons CC0 public domain dedication.

**Funding:** This research was supported in part by the Molecular Libraries Initiative of the National Institutes of Health (NIH) Roadmap for Medical Research (grants 1 R03 MH092154-01 (DMWIII) and U54MH084681 (AS)) and the Intramural Research Program of NIA, NIH. The funders had no role in study design, data collection and analysis, decision to publish, or preparation of the manuscript.

**Competing Interests:** The authors have declared that no competing interests exist.

\* E-mail: wilsonda@mail.nih.gov (DMW); asimeono@mail.nih.gov (AS)

## Introduction

The genome of mammalian cells is under constant threat from both endogenous (namely reactive oxygen species, such as the superoxide anion, hydroxyl radical, hydrogen peroxide, and nitrogen-reactive species) and exogenous (*e.g.*, sunlight, ionizing radiation, chemical compounds and genotoxic drugs) DNA damaging agents that can introduce mutagenic and cytotoxic DNA lesions [1,2]. For example, it has been estimated that spontaneous depurination events result in more than 10,000 abasic lesions per mammalian cell per day [3,4]. Left unrepaired, DNA damage can result in detrimental biological consequences to the organism, including cell death and mutations that drive transformation to malignancy. Cells use various DNA repair systems as defenses to protect their genomes from DNA damaging agents and to maintain genome stability [5,6,7]. Not surprisingly, cells with a defect in one of their DNA repair mechanisms are typically more sensitive to certain genotoxic agents and suffer increased mutagenesis.

Most antitumor drugs (*e.g.*, alkylating, cross-linking and intercalating agents, topoisomerase inhibitors, and certain anti-

metabolites) induce DNA lesions that ultimately block or interfere with DNA replication in rapidly dividing cancer cells, resulting in increased susceptibility to activation of various programmed cell death responses [8]. An elevated DNA repair capacity in tumor cells results in anticancer drug and radiation resistance, severely limiting the efficacy of these agents. Recent basic and clinical studies have demonstrated emerging concept designs to block the functions of various proteins in specific DNA repair pathways, which would sensitize cancer cells to DNA damaging agents and potentially lead to an improved therapeutic outcome [9,10].

The base excision repair (BER) pathway is responsible for correcting damage to single DNA bases or to the sugar moiety of the phosphodiester backbone. Typically, the BER process starts with the enzymatic removal of a damaged base by either a mono- or a bi-functional DNA glycosylase, which creates an abasic (AP) site or in some instances a DNA strand break. The AP site is incised by an essential enzyme known as apurinic/aprimidinic endonuclease-1 (APE1) [11], which generates a single-stranded gap in DNA with 3'-hydroxyl and 5'-deoxyribosephosphate termini. This gap is filled in and ultimately sealed by the concerted

action of DNA polymerases and ligases [4]. In mammalian cells, APE1 is responsible for at least 95% of the endonuclease activity that incises at abasic sites as part of the short-patch and long-patch BER subpathways. APE1 has been found not only to be required for animal viability, as deletion of both alleles of the *APE1* gene in mice leads to embryonic lethality, but also for cell viability in culture [12,13].

Elevated levels of APE1 have been found in medulloblastoma and primitive neuroectodermal tumors, prostate cancers, head-and-neck cancers, non-small cell lung carcinomas, gliomas, and osteosarcomas [4]. Over-expression of APE1 has been correlated with increased cellular resistance to chemotherapeutic agents. Moreover, APE1-deficient cells exhibit hypersensitivity to methyl methanesulfonate (MMS), hydrogen peroxide, bleomycin, temozolomide, gemcitabine, 1,3-bis (2-chloroethyl)-1-nitrosourea (a.k.a. *Carmustine*), and the nucleoside analogue  $\beta$ -L-dioxolane-cytidine (a.k.a. *Troxacitabine*) [4,14]. Furthermore, the expression of a dominant-negative APE1 protein (termed ED), which binds with high affinity to substrate DNA and blocks subsequent repair steps [15], augments the cell killing effect of 5-fluorouracil and 5-fluorodeoxyuridine, implicating BER in the cellular response to such anti-metabolites [16]. These data indicate that APE1 is an attractive and rational target in the effort to improve therapeutic efficacy of clinical DNA-interactive drugs through the inactivation of the critical BER pathway.

A significant limitation of anti-cancer cytotoxins is their harmful side-effects on normal tissue. While combinatorial treatment strategies are still of interest, researchers and clinicians have been pursuing the idea of synthetic lethality to reduce potential off-target toxicities. In this scenario, inhibition of two independent processes separately has little cellular consequence, whereas inactivation of both pathways simultaneously leads to cell death. This model has been exploited in the case of cancers deficient in the breast cancer-related homologous repair proteins, BRCA1 and BRCA2. Here, inhibitors against the poly(ADP-ribose) polymerase protein, PARP-1, which operates in strand break responses, including the single-strand break repair sub-pathway of BER, have been shown to induce selective cell killing of BRCA-deficient cells [8,17], presumably due to replication fork collapse and increased genetic instability. Relevant to the effort within, inhibitors against APE1 have been found to be synthetically lethal to cells deficient in BRCA1 or BRCA2, or the checkpoint signaling protein ATM, inducing accumulation of DNA double-strand breaks as well as G2/M cell cycle arrest [18].

A number of chemical libraries have been screened to identify small molecule inhibitors of APE1 endonuclease activity [19,20,21,22,23]. Several molecules were identified from these efforts, including 7-nitro-indole-2-carboxylic acid identified from a screen of a 5000-compound collection [19]; several arylstibonic acid derivatives identified from a screen of the National Cancer Institute Diversity Set [20]; Reactive Blue 2, 6-hydroxy-DL-DOPA, and myricetin, reported as prioritized hits from a screen of the LOPAC<sup>1280</sup> collection of bioactive compounds [21]; and 2,4,9-trimethylbenzo [b] [1,8] naphthyridin-5-amine (dubbed AR03), selected as the top hit from a 60,000-member library screen [23]. Additionally, an *in-silico* screen based on a pharmacophore approach has led to the identification of several APE1 inhibitors sharing a hydrophobic middle segment to which at least two carboxyl substituents (or other negatively charged groups) are attached via a range of linkers [22]; however, APE1 inhibition has not been demonstrated for these compounds in cell-based models. At present, none of the above compounds has been shown to have clinical utility and, with very few exceptions, the inhibitors reported to date are not readily amenable to further optimization

by medicinal chemistry due to multiple liabilities stemming from their chemical structure [24].

We describe herein the first small molecule inhibitors of human APE1 identified by quantitative high-throughput screening (qHTS) [25] of a large public compound collection, the Molecular Libraries Small Molecule Repository (MLSMR) of >300,000 compounds, as well as additional public libraries of the NIH Chemical Genomics Center. Prioritized hits were further characterized by a panel of biochemical assays and in MMS cell toxicity potentiation models. Select compounds were also tested in an AP site measurement assay designed to ascertain the inhibitors' effect on APE1 within a cellular context.

## Materials and Methods

### Reagents

Dimethyl sulfoxide (DMSO, certified ACS grade) was purchased from Thermo Fisher Scientific. Tris-HCl, Thiazole Orange (ThO), Tween-20, NaCl, and MgCl<sub>2</sub> were obtained from Sigma, while the arylstibonic control inhibitor NSC-13755 was supplied by the National Cancer Institute Developmental Therapeutics Program Repository.

The enzymes and substrates employed in this study (human APE1 and *E. coli* Endo IV enzymes, fluorogenic and radioassay substrates) were prepared and characterized as described previously [21]. The fluorescent probe employed in the fluorescence polarization (FP) displacement assay was of the same composition as the fluorogenic HTS substrate with the exception of the Black Hole Quencher-2 moiety. The double-stranded 17-mer DNA fragment used in the ThO DNA binding assay was of the same sequence as the fluorogenic HTS substrate but carried no dye labels.

### Compound Library

The 352,498-member library comprised two main subsets: NIH Molecular Libraries Small Molecule Repository (MLSMR), prepared as 10 mM stock solutions in 384-well plates and delivered by Biofocus DPI (South San Francisco, CA, <http://mli.nih.gov/mli/compound-repository/mlsmrcompounds/>), and NCGC internal exploratory collection, which consisted of several commercially available libraries, as well as collections from academic compound libraries. The compound library was sourced as DMSO solutions at initial concentrations ranging between 2 and 10 mM and was further serially diluted for qHTS in 1536-well format as described in detail elsewhere [26,27]. For follow-up testing of primary screen actives, screening hits and their analogues were sourced as powders from the respective original suppliers (Sigma-Aldrich, NCI, Asinex, ChemBridge, Tocris, Ambinter, and ChemDiv), dissolved in DMSO to produce 10 mM initial stock solutions, and serially diluted in twofold steps for a total of 12 concentrations in duplicate. The identities of all compounds screened are available in PubChem under Assay Identifier 2517, <http://pubchem.ncbi.nlm.nih.gov/>.

### High-throughput Screen

The screen was performed following the previously published protocol [21]. All screening operations were performed on a fully integrated robotic system (Kalypsys, San Diego, CA) [28] with library plates screened proceeding from the lowest to the highest concentration to minimize compound carryover [26]. Vehicle-only plates, with DMSO being pin-transferred to the entire column 5–48 compound area, were included regularly throughout the screen in order to record any systematic shifts in assay signal.

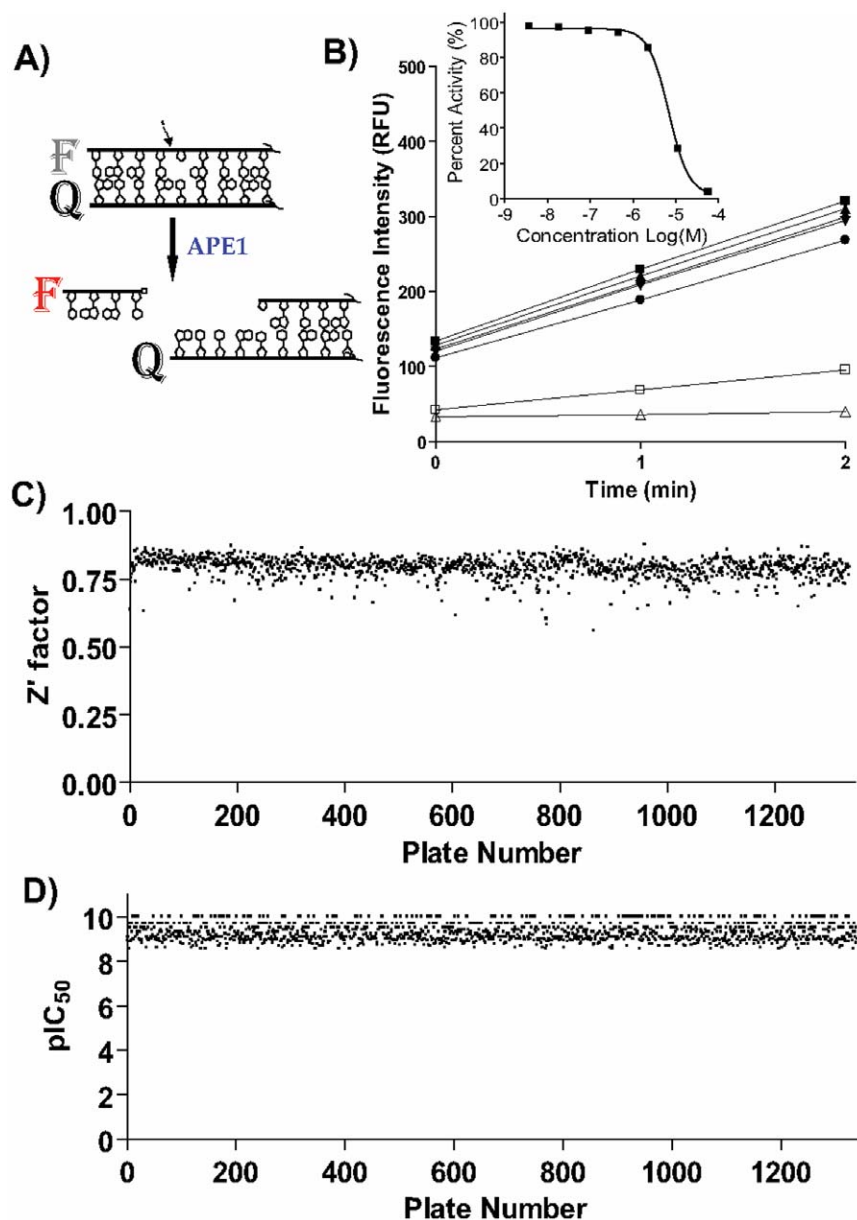

**Figure 1. High-throughput screen.** A) Assay principle. APE1 catalyzes and incision 5' relative to the abasic site analog (THF) to liberate a short 5'-fluorophore donor F-labeled deoxyoligonucleotide, causing increased fluorescence signal. F represents TAMRA fluorophore and Q represents Black Hole Quencher 2. The APE1 incision site is indicated by the arrow. B) High-speed data collection allows monitoring of the reaction progress in kinetic mode as shown in the main panel (3 data points collected over the course of 2 min, shown for 7 wells representing the serial dilution of library compound MLS000090966); the changes in fluorescence signal for each well over the two-minute period are normalized against no-enzyme and no-inhibitor controls to produce the concentration response curve for the sample as shown in the inset. C) A stable Z' screening factor was maintained throughout the screen. D) A dilution series of the previously reported arylstibonic acid inhibitor NSC-13755 applied to every assay plate yielded a near-constant IC<sub>50</sub> of 35 nM.  
doi:10.1371/journal.pone.0047974.g001

During the screen, reagent bottles were kept at 4°C and all liquid lines were covered with aluminum foil to minimize degradation.

Screening data were corrected and normalized, and concentration-effect relationships was derived using in-house developed algorithms [25]. Percent activity was computed after normalization using the median values of the uninhibited enzyme control (32 wells located in column 1) and the no-enzyme, or 100% inhibited, control (64 wells, entire columns 3 and 4), respectively, and concentration-response data were fitted using a four parameter Hill equation [29] by minimizing the residual error between the

modeled and observed responses. After curve fitting, active compounds were analyzed based on their potency and concentration-response curve characteristics, taking into consideration the presence of asymptotes, efficacy of response, and confidence of curve fit [25]. After preliminary clustering of actives based on structural similarity analysis using Leadscape software (Leadscape Inc., Columbus, OH) [30] selected hits were procured for re-testing in the primary screening assay and potential follow-up studies.

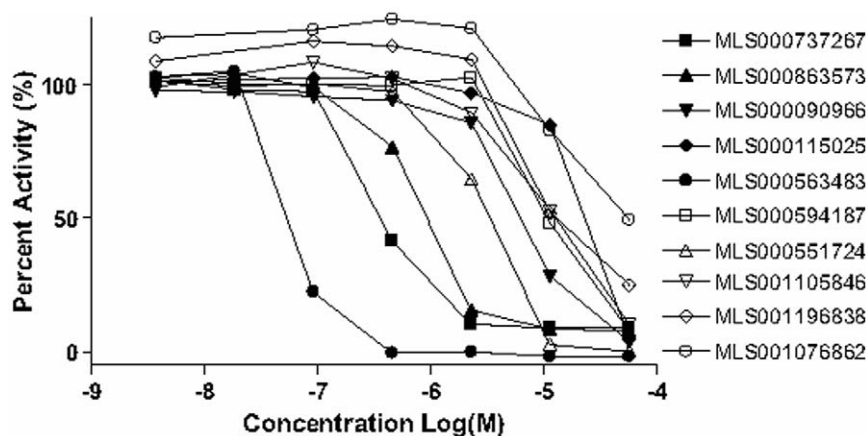

**Figure 2. Representative curves observed from 10 screening hits chosen to demonstrate the range of potencies observed in the concentration-response-based screen.** Structures and additional data associated with these hits are presented within Figure 7.  
doi:10.1371/journal.pone.0047974.g002

### ThO DNA Displacement and *E. coli* Endo IV Profiling Assays

In order to screen out nonselective compounds, such as non-specific DNA binders and inhibitors of related enzymes, we used a miniaturized ThO DNA displacement assay and a counterscreen against the bacterial endonuclease *E. coli* Endo IV, respectively, following the previously published protocols [21].

### Fluorescence Polarization (FP) Displacement Assay

Double-stranded oligodeoxynucleotide containing tetrahydrofuran (THF) basic site labeled with TAMRA at the 5'-end was used as the labeled binding probe. Inhibition of APE1 binding to labeled probe was detected by a decrease in the fluorescence polarization (FP) of the fluorophore. Briefly, 4  $\mu$ L mixture of 20 nM APE1 and 5 nM probe contained in the enzymatic assay buffer from which  $Mg^{2+}$  was omitted, was dispensed into 1536-

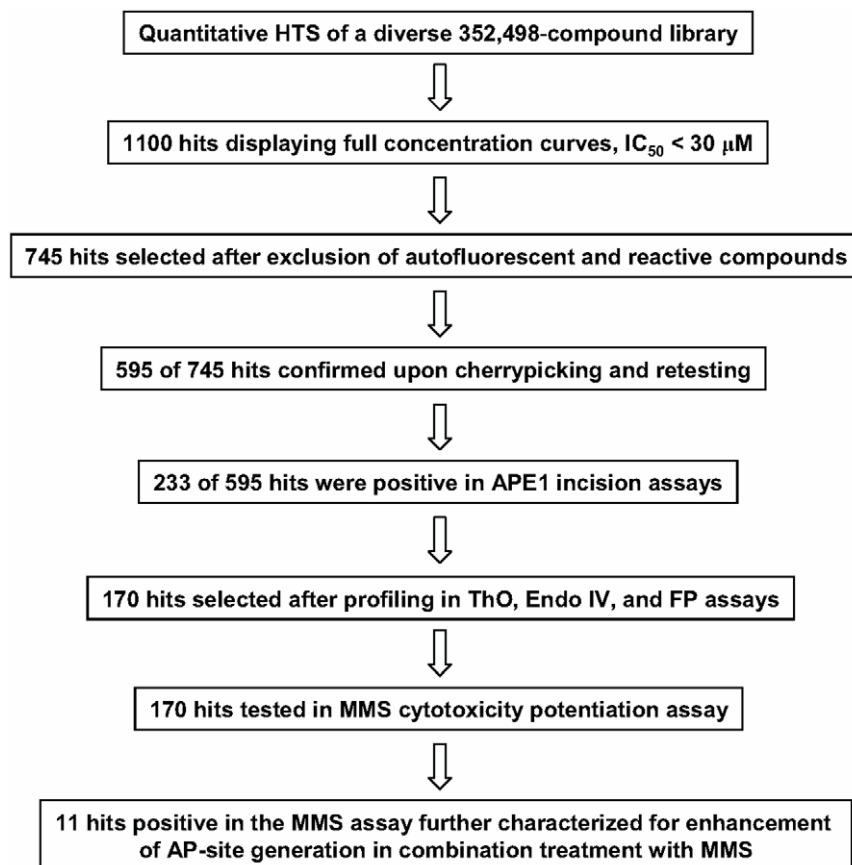

**Figure 3. Hit progression flow chart.**  
doi:10.1371/journal.pone.0047974.g003

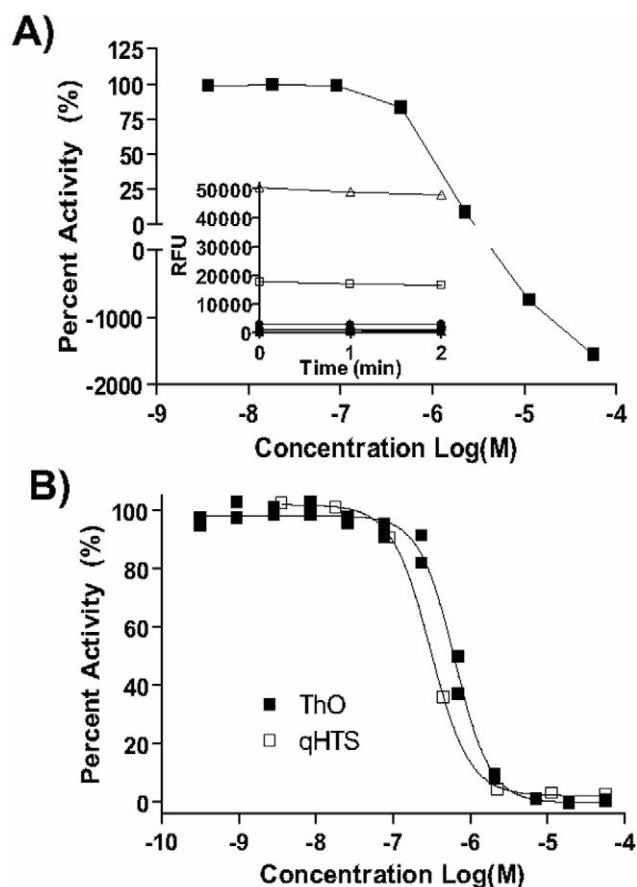

**Figure 4. Elimination of assay artifacts and promiscuous hits.** A) An autofluorescent compound contributes fluorescence intensity well in excess of the assay reaction's average leading to the computation of aberrant concentration response curve. B) An example of a promiscuous hit acting by strong DNA binding as evidenced by the highly similar concentration responses observed in the primary screen (empty squares) and the ThO counterscreen (filled squares). doi:10.1371/journal.pone.0047974.g004

well Greiner black solid bottom plates. Compounds (23 nL) were transferred via pintool, and after a 15-minute incubation at room temperature, fluorescence polarization was measured in a ViewLux High-throughput CCD imager (480 nm excitation and 540 nm emission) to determine the degree of probe displacement caused by the test compounds.

### Gel-based APE1 Assays

To test the compounds' inhibitory activity after the primary screen, two assays designed to monitor the cleavage of substrate to product through electrophoretic separation were utilized. The radiotracer incision assay, utilizing a  $^{32}\text{P}$ -labeled substrate, was performed essentially as described [21,31,32]. Incision reactions utilizing  $^{32}\text{P}$ -labeled substrate were carried out for 5 min at  $37^\circ\text{C}$ . After the addition of an equal volume of stop buffer (0.05% bromophenol blue and xylene cyanol, 20 mM EDTA, 95% formamide), the substrate and product were separated on a standard polyacrylamide denaturing gel and quantified by PhosphorImager analysis [32]. The fluorescence-based assay utilized a 5'-TAMRA labeled 32-mer oligonucleotide containing a THF moiety at position 18 (5'-TAMRA-TTTTTTTTTTTTTTACCGTACGACTCCGT-3') annealed with a complementary 20-mer oligonucleotide (5'-ACG-

GAGTCGTACGAGGGTGA-3') was used in this assay. APE1 cleavage of the substrate results in a 18-mer TAMRA-labeled fragment which was separated by a non-denaturing polyacrylamide gel electrophoresis and quantitated in a Gel Doc XR imaging system, BioRad (Hercules, CA). The advantage of this assay is that it can be used in a relatively high throughput mode with the inhibitors tested at a range of concentrations (0.17  $\mu\text{M}$  to 125  $\mu\text{M}$  was used here). APE1 (0.15 nM) was added to a reaction mixture of 20  $\mu\text{L}$  containing assay buffer (40 mM HEPES pH 7.5, 50 mM NaCl, 1 mM  $\text{MgCl}_2$  and 2 mM DTT), and labeled ds DNA substrate (final 75 nM). The mixture was incubated at RT for 15 min, and the reaction was stopped by the addition 20  $\mu\text{L}$  of 2X dye stop solution (10% glycerol, 20 mM EDTA and bromophenol blue). Then 10  $\mu\text{L}$  of the mixture was resolved on 20% polyacrylamide gel in 1X Tris-borate EDTA running buffer at 250 V for 40 min.

### MMS Potentiation Assay

HeLa cells were plated at 6000 cells/well in DMEM culture medium containing 10% FBS into white solid bottom 384-well cell culture plates. The plates were incubated at  $37^\circ\text{C}$  overnight for cell attachment, followed by media replacement. The fresh medium contained serial dilutions of compounds of interest in the presence (0.4 mM final) or absence of MMS. The plates were incubated for 24 h at  $37^\circ\text{C}$ . Cell viability was determined by luminescence detection after an addition of 15  $\mu\text{L}$  of CellTiter Glo reagent (Promega, Madison, WI). Percent viability was calculated for each concentration of compound tested in duplicate by relating the corresponding luminescence to that of a negative DMSO vehicle control. MMS potentiation trends were defined as follows: negative (-), if cell viability in the compound-plus-MMS treatment was the same as that of the DMSO-plus-MMS control (overlapping dose-response curves); inconclusive (I), if the shift in the cell viability dose-response upon MMS inclusion relative to compound-alone was less than 30%; and positive (P), if the difference between the compound-plus-MMS and compound-alone curves was at least 30%, and maintained within at least a two-fold compound concentration span.

### AP Site Measurement

HeLa cells at 80% confluency ( $6 \times 10^5$  cells) were subjected to the following treatments in a 6-well plate for 24 hours at  $37^\circ\text{C}$ : 1) DMSO alone, 2) 275  $\mu\text{M}$  MMS, 3) APE1 inhibitors dissolved in DMSO (5–20  $\mu\text{M}$  final compound concentration), and 4) the inhibitors as in treatment 3 in combination with 275  $\mu\text{M}$  MMS. Cells were then harvested and processed using a Qjagen Genomic DNA isolation kit (Germantown, MD). After DNA quantitation, AP sites were measured using the DNA Damage Quantification kit from Dojindo Molecular Technologies (Rockville, MD).

## Results and Discussion

### Quantitative High-throughput Screen

To screen for inhibitors of APE1 incision activity, we employed a purified-enzyme biochemical assay with a model substrate featuring a red-shifted fluorescent reporter in combination with a dark non-emitting quencher. These moieties were incorporated as end labels onto a 17-mer double-stranded DNA fragment containing a centrally-located tetrahydrofuran AP site sugar mimetic, which serves as the APE1 cleavage site. Upon APE1-catalyzed strand scission immediately 5' to the AP site analog, the shortened oligodeoxynucleotide carrying the fluorescent reporter spontaneously dissociates from the rest of the substrate, leading to an increase in fluorescence due to its spatial separation from the

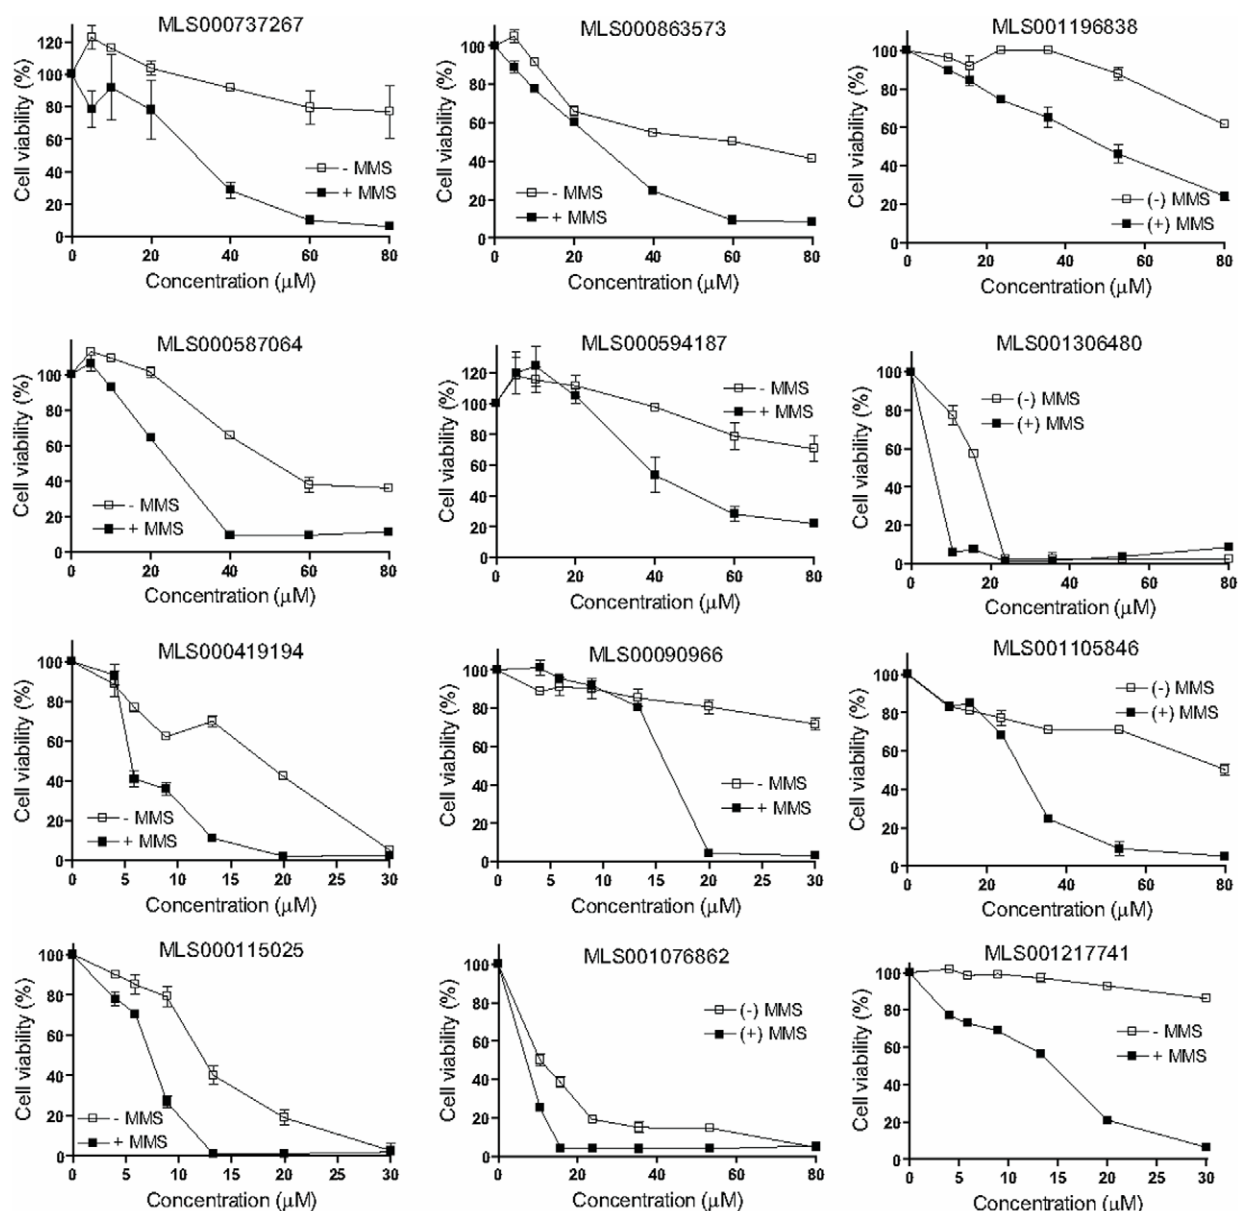

**Figure 5. Significant potentiation of the genotoxic effect of MMS by 12 prioritized hits (designated P in Table S1).** HeLa cells were exposed to a dilution series of each compound shown in the absence (empty squares) and presence of 400  $\mu\text{M}$  MMS (filled squares), and after a 24-hour incubation the cell viability was measured by ATP-content detection using CellTiter Glo. Results are presented as averages and standard deviations from duplicate samples, normalized against control. doi:10.1371/journal.pone.0047974.g005

dark quencher (Figure 1A). Further details on the generation and validation of this substrate in fully-integrated robotic miniaturized assays have been reported elsewhere [21]. Prior to the full-collection screen, the assay was tested and found to perform reproducibly by screening the LOPAC<sup>1280</sup> library of pharmacologically active compounds in triplicate using a fully-integrated robotic system (data not shown).

The assay was applied to screen a diverse 352,498-compound library that contained the National Institutes of Health public collection, the MLSMR. The compounds tested were arrayed as seven-point titrations, at final concentrations of 57  $\mu\text{M}$ , 11.4  $\mu\text{M}$ , 2.3  $\mu\text{M}$ , 457 nM, 91 nM, 18 nM, and to 3.7 nM. Using a high-speed whole-plate fluorescence imager, the assay data for the entire screen was conducted in kinetic mode, with the APE1

incision reaction being monitored over the initial linear time frame of 2 min (Figure 1B). Thus, any inhibition associated with each sample was computed from the alteration in fluorescence intensity over the time-course measurement period, after normalization against the appropriate controls (Figure 1B, inset). The assay performed well during the entire course of the screen: the Z' statistical factor remained consistent without fluctuation, at an average of 0.79 (the maximum Z' factor possible is 1.0, with values of greater than 0.5 being considered an indication of a highly stable screening assay) [33] (Figure 1C). In addition, the intra-plate control titration of the arylstibonic inhibitor NSC-13755 [20] yielded a near-constant concentration-response curve with an average  $\text{IC}_{50}$  of 35 nM and a minimum significant ratio of 1.9 (the best possible ratio is 1.0, while ratios of less than 4 are generally

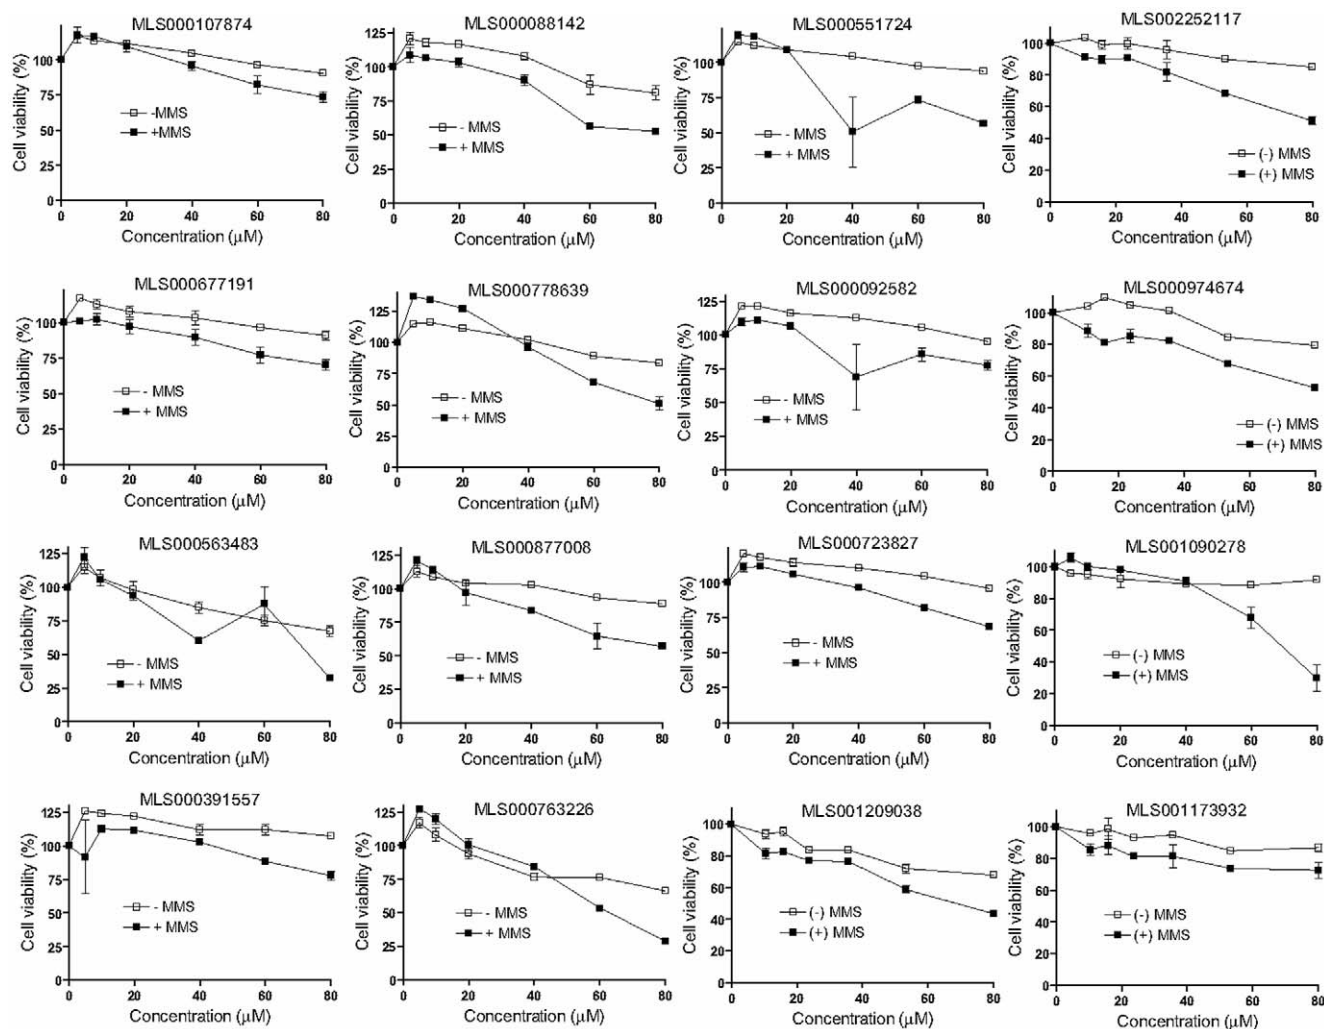

**Figure 6. Modest potentiation of the genotoxic effect of MMS exhibited by 16 prioritized hits (designated I in Table S1).** HeLa cells were exposed to a dilution series of each compound shown in the absence (empty squares) and presence of 400  $\mu\text{M}$  MMS (filled squares), and after a 24-hour incubation the cell viability was measured by ATP-content detection using CellTiter Glo. Results are presented as averages and standard deviations from duplicate samples, normalized against vehicle control. doi:10.1371/journal.pone.0047974.g006

indicative of an assay with high test-to-test reproducibility of dose responses) [27,34] (Figure 1D).

Unlike traditional HTS, qHTS provides a concentration response curve (CRC) for each compound and allows for calculation of an  $\text{IC}_{50}$  value for each compound in the primary screen. Approximately 1,100 compounds with full concentration-response curves and  $\text{IC}_{50}$  values of less than 30  $\mu\text{M}$  were identified, and similarity analysis of the hits led to 121 clusters and 154 singletons, representing a wide variety of structural classes (the qHTS results are available in PubChem under Assay Identifier 2517, <http://pubchem.ncbi.nlm.nih.gov/>). Representative concentration-response curves from 8 hits spanning most of the potency range (double-digit nanomolar to double-digit micromolar  $\text{IC}_{50}$ ) are shown in Figure 2. The progression of hits through the respective steps of cheminformatics analysis, confirmatory testing, and additional profiling, is depicted as a flow chart in Figure 3.

After exclusion of heavy metal- and reactive functionality-containing molecules, and after using the real-time kinetic screening data to flag compounds that interfere with the assay

signal by contributing excessive amounts of fluorescence [35] (an example of a highly fluorescent hit, the bioactive fluorescent sensor calcein NCGC00094849, is shown in Figure 4A), 745 hits were selected for further characterization based on potencies and concentration-response curve quality. Of the 745 cherry-picked compounds, 595 (80%) exhibited activity upon retesting using the original fluorogenic screening assay.

### Follow-up Testing of Primary Screening Hits

To eliminate false positive hits, all 595 confirmed molecules were tested for their ability to inhibit APE1 incision activity using biochemical assays that involve electrophoretic separation of the substrate and cleavage product. We adopted a two-step approach: (1) hits possessing complete screen-derived concentration response curves were tested at a single concentration in the low-throughput electrophoretic separation assay with radiolabel detection and (2) lower confidence hits possessing either incomplete or noisy concentration response curves were tested as a seven-point dilution series using a higher-throughput electrophoretic separation assay with fluorescence detection. Of the 391 compounds tested in the

| Structure and ID                                                                                  | qHTS | Gel          | FP   | MMS | Structure and ID                                                                                  | qHTS | Gel          | FP   | MMS | Structure and ID                                                                                    | qHTS | Gel | FP   | MMS |
|---------------------------------------------------------------------------------------------------|------|--------------|------|-----|---------------------------------------------------------------------------------------------------|------|--------------|------|-----|-----------------------------------------------------------------------------------------------------|------|-----|------|-----|
| 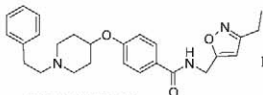<br>MLS001105846 | 11.9 | 4.5 $\mu$ M  | 32.4 | P   | <br>MLS000587064 | 2.8  | 14%          | P.C. | P   | <br>MLS000090966  | 7.07 | 5%  | P.C. | P   |
| <br>MLS001196838 | 6.8  | 7.9 $\mu$ M  | N.A. | P   | <br>MLS000737267 | 0.4  | 46%          | N.A. | P   | <br>MLS000594187  | 10   | 50% | P.C. | P   |
| <br>MLS001306480 | 15.0 | 12.6 $\mu$ M | 32.4 | P   | <br>MLS000419194 | 14.1 | 2%           | 2.5  | P   | <br>MLS0000115025 | 28.1 | 48% | P.C. | P   |
| <br>MLS001076862 | 10.6 | P.C.         | P.C. | P   | <br>MLS001217741 | 16.8 | 22.4 $\mu$ M | N.A. | P   | <br>MLS000863573  | 0.7  | 4%  | P.C. | P   |

**Figure 7. Screening hits showing significant activity in the MMS cytotoxicity enhancement experiments.** qHTS,  $IC_{50}$  ( $\mu$ M) obtained in the initial quantitative high-throughput screen; Gel, percent incision observed in the presence of 100  $\mu$ M compound using the radiotracer detection or estimated  $IC_{50}$  value ( $\mu$ M) using the fluorescence detection; FP,  $IC_{50}$  ( $\mu$ M) or annotation of response (N.A., no activity observed); P.C., partial concentration response curve) obtained in the fluorescence polarization displacement assay; MMS, potentiation of the genotoxic effect of methylmethane sulfonate (P, positive).  
doi:10.1371/journal.pone.0047974.g007

radioassay, 112 displayed at least 50% inhibition of APE1 activity at 100  $\mu$ M. Given that the radioassay was specifically conducted at a substrate conversion rate approaching 100%, the fact that a majority of the HTS hits (namely, the weakest and most nonspecific) failed to pass this rigorous APE1 inhibition criterion was not unexpected. Of the 204 compounds tested in the fluorescence-based gel assay, 111 displayed reproducible dose-dependent inhibition. A total of 223 positive compounds showing activity in these electrophoretic separation based assays were then subjected to a panel of assays in order to further assess their engagement with the APE1 target *in vitro*, as well as to evaluate their selectivity. The complete set of results obtained for these 223 compounds in the below tests is provided within Table S1.

To detect screening hits that inhibit APE1 activity through non-specific DNA interactions, we employed a previously established miniaturized ThO dye displacement assay [21]. Forty-three compounds were active in the DNA-binding counter-screen; the majority of these compounds were weak DNA binders (Table S1). Most of the DNA binders possessed the typical chemical features associated with DNA binding: (i) extended conjugated unsaturated ring systems, which would allow them to intercalate between the stacked bases, and/or (ii) accumulation of positively-charged nitrogens, which would permit nonspecific electrostatic interactions with DNA. Of note, classic DNA binders, such as daunorubicin- and tetracycline-like compounds (for example NCGC00093976, NCGC00024246, and NCGC00163605, Table S1), exhibited a strong dose-dependent fluorescence signal increase due to their autofluorescent properties, which interfered with the ThO signal and produced distorted dose-response curves. One of the most potent DNA binders among the tested HTS hits was phthalocyanine tetrasulfonate hydrate (NCGC00165867), with a ThO dye displacement  $IC_{50}$  of 0.631  $\mu$ M, which is a very similar

potency to that seen in the primary screening assay (Figure 4B). We note that the ThO assay reports primarily on DNA binders acting through intercalation, while potentially missing other types of DNA binders, such as those acting through the minor groove. However, promiscuous DNA binders which may have been missed by the ThO assay are likely to be flagged during the next profiling step, *i.e.* the test for inhibition of *E. coli* EndoIV, described below.

To probe the selectivity of the candidate APE1 inhibitors, we tested them against *E. coli* EndoIV [36], employing the same assay as used in the HTS. *E. coli* EndoIV, while exhibiting similar biochemical activities to APE1, such as AP site incision, has no sequence or structural homology to human APE1 [37], and thus serves as a tool for identifying broad-acting endonuclease inhibitors. Twenty-one compounds yielded full or partial concentration response curves against EndoIV (Table S1). Of these 21 compounds, 15 were already revealed as DNA binders by the ThO assay, and thus, were anticipated to represent non-specific inhibitors. Of the EndoIV-positive hits, only six (compounds NCGC00024246, NCGC00094813, NCGC00159344, NCGC00161415, NCGC00165867, NCGC00166058, Table S1) possessed complete concentration response curves for EndoIV, and the  $IC_{50}$  values of these compounds were significantly higher than the corresponding APE1 potencies. These results indicate that the majority of qHTS-output compounds more selectively inhibit APE1 than EndoIV, and the six compounds above represent potential starting points for the design of EndoIV-specific inhibitors.

To gain insight into the mode of action of the hits, we employed a displacement assay combined with fluorescence polarization (FP) detection to test the small molecule's effect on the binding of APE1 to a version of the fluorogenic AP site-containing oligonucleotide substrate that was devoid of the quencher functionality. FP is a



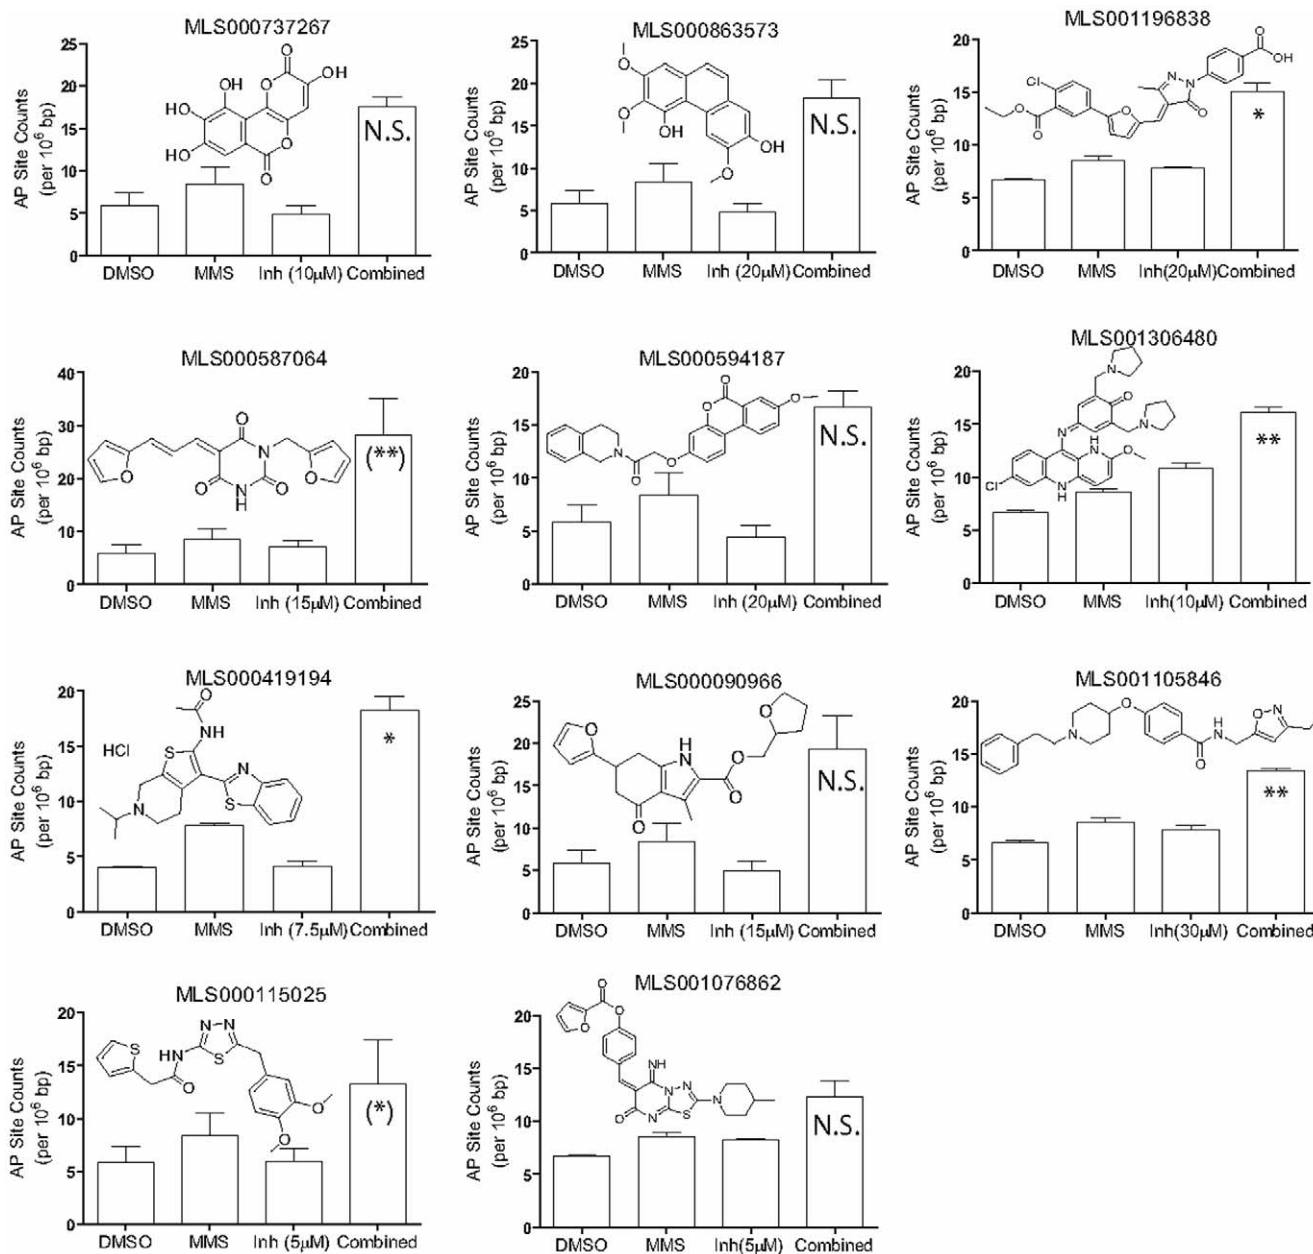

**Figure 8. AP-site accumulation.** HeLa cells were exposed to each compound shown in the absence and presence of 275  $\mu$ M MMS, and total genomic AP sites were measured as described in Methods. The number of AP sites per  $10^6$  base pairs of genomic DNA are presented as the average and standard deviation of two independent measurements. P-values (\* $P$ <0.05, \*\* $P$ <0.01) were calculated to evaluate the significance of the enhancement of AP site levels produced by the combined treatment versus MMS alone. N.S., not significant ( $P$ ≥0.05); P-value designations for MLS000587064 and MLS000115025 shown in parentheses are derived from the repeat testing reported in Figure S1. doi:10.1371/journal.pone.0047974.g008

convenient technique for providing a basic characterization of macromolecular associations, such as protein-DNA [38] and protein-protein interactions [39]. Following incubation of the compound, APE1, and DNA substrate together, inhibition of APE1 binding to AP-DNA would be revealed as a decrease in FP of the fluorophore. The assay, which is performed in the absence of magnesium to prevent enzymatic turnover, is target DNA-specific, as APE1 binds with higher affinity to duplex DNA containing an AP site than to an undamaged counterpart [36]. Of the 223 hits validated in the electrophoretic separation assays, 70 compounds showed a concentration-dependent decrease in FP in

the displacement assay, indicating an inhibition of APE1 AP-DNA binding. These results provide an early indication with respect to the mechanism of action of each compound, although the sensitivity of the displacement assay is lower than that of the enzymatic assay, making it difficult to reveal relevant, but weak, protein binders.

#### Potential of the Genotoxic Effect of MMS in HeLa Cells

To examine the biological prospects of the top compounds, we tested their ability to inhibit APE1 DNA repair activity by assessing enhancement of MMS toxicity in mammalian cells.

MMS creates methylated-base damage to genomic DNA, which, when excised by an alkylpurine DNA glycosylase, results in a high number of cytotoxic AP sites [40]. We compared the viability of HeLa cells exposed to a dilution series of inhibitor alone to a combination of a fixed MMS concentration with the same dilution series of inhibitor by using a standard CellTiter Glo luminescence assay. This technique measures the number of viable cells in culture based on quantitation of the ATP present, which signals the presence of metabolically active cells. The assay was further optimized for 384-well plates, allowing a high-throughput testing of multiple hits at multiple concentrations, a scope of investigation previously impossible due to the very low throughput of the traditionally applied colony formation assay.

From the 223 compounds found positive in the gel-based APE1 assays, exclusion of the most promiscuous hits, that is, those that were both DNA binders and EndoIV-inhibitory, yielded a set of 170 compounds (Figure 3). This shortened group of hits was tested in the cell-based potentiation assay for their ability to dose-dependently enhance sensitivity of HeLa cells to the alkylating agent MMS. Of the 170 compounds tested, 12 enhanced the cytotoxicity of MMS significantly (the difference between the compound-plus-MMS and compound-alone responses was at least 30% and was maintained within at least a two-fold compound concentration range, Figure 5), while 16 compounds produced a modest response (the separation between the curves was greater than the errors of measurement but was less than 30% viability at any given compound concentration, Figure 6). The structures and assay data associated with the 12 compounds that exhibited significant effect in the MMS potentiation assay are presented in Figure 7.

### AP Site Accumulation

As stated above, the application of the genotoxic agent MMS results in an increase in the level of AP sites within the genome. An effective APE1-targeted inhibitor applied under the conditions of increased genotoxic stress is expected to interfere with the repair of AP sites, while ideally having no effect on the AP site levels when applied as a single agent. Thus, the net effect of treating cells with a combination of MMS and inhibitor would be an increase in the number of AP site lesions. To determine the effect on AP site accumulation caused by treatment with MMS in combination with an APE1 inhibitor, as compared to treatment with MMS or inhibitor alone, we measured AP site levels in the chromosomal DNA from HeLa cells using an aldehyde-reactive probe-based colorimetric assay [40]. The concentrations of MMS and inhibitor (275  $\mu$ M for MMS and between 5 and 30  $\mu$ M for the inhibitor, respectively) were selected to fall below the onset of cytotoxicity for each agent based on the analysis of the MMS potentiation data shown in Figure 5.

Of the 12 compounds that significantly enhanced the cytotoxicity of MMS (Figure 3), 11 were tested in the AP site accumulation experiments (MLS001217741 was not tested due to resupply shortage). These experiments revealed that in general the number of AP sites was only slightly increased in the cells exposed to the compounds alone relative to the vehicle control, but was significantly increased when cells were exposed to both MMS and most of the tested compounds (Figure 8). The exceptions to this trend were inhibitors where a noticeable increase in AP sites was observed upon treatment with the inhibitor alone (MLS001306480 ( $P = 0.0198$ ), MLS001196838 ( $P = 0.0238$ ), MLS001076862 ( $P = 0.0234$ )). Thus, compounds whose application as single agents resulted in an increase in AP sites may be of lesser utility as drug candidates, due to their potential to induce genotoxic damage by themselves. Also, for several hits, the

combination treatment raised the level of AP sites very slightly (relatively small standard deviations and no statistical significance between AP site levels detected in combination treatments versus MMS-alone: MLS000737267, MLS000863573, MLS000594187, MLS001076862) or the increase in AP site levels with the combined treatment was obscured by large standard deviations observed in the combination experimental group (MLS000587064, MLS000090966, and MLS000115025). In an attempt to provide further support for the preliminary trends, we ran additional AP-site measurement experiments on the three hits (MLS000587064, MLS000090966, and MLS000115025) which produced the large error bars seen in the “Combined” treatment category (Figure 8): the repeat tests produced smaller standard deviations and appear to support the initially-observed enhancements for MLS000587064 and MLS000115025 (Figure S1). We note that because the AP site experiments are laborious in nature, and consistent with the need to provide initial profiling on a relatively large number of screening hits, the number of replicates incorporated in this experiment (two), as well as the combinations of inhibitor and MMS concentrations, were insufficient for a complete statistical analysis of the trends. In order for a true Combination Index to be derived [41], which in turn would allow for a definitive conclusion to be drawn regarding the potential synergistic nature of the inhibitor effect on the MMS genotoxicity, a large matrix of inhibitor and MMS concentrations needs to be tested, making it impossible to provide such an exhaustive characterization for all top hits reported here. We further note that given the laborious nature of the AP site experiments, we have limited this initial study to only the 24-hour treatment condition: the longer-term effect ( $>3$  days of treatment) of APE1 inhibitors on AP site accumulation is an important factor to consider during the development of one or more of the hits, particularly given the previously-highlighted vital role of APE1 as a resolver of abasic DNA damage accrued through natural causes [12].

With the exception of MLS001306480, an antimalarial pyronaridine used primarily in China [42], which is a quina-crine-like molecule that bears distant resemblance to the previously published APE1 inhibitors lucanthone [43], mitoxanthrone [21], and Reactive Blue 2 [21], none of the hit compounds that caused an increase in AP sites in cells under genotoxic stress were similar to previously reported APE1 inhibitors, including AR03 [23] or the pharmacophore model advanced by Zawahir and colleagues [22]. This overall result provides a support to the notion that screening of additional libraries to find novel APE1 inhibitory scaffolds is indeed a viable approach.

Of the top hits, substituted isoxazole alkylamines like MLS001105846 have been patented as agri-horticultural fungicides [44]. Although outside this current profiling work, the MLS001105846 compound does not appear to have been tested in conjunction with human disease applications. MLS000419194 possesses no obvious liabilities and was recently taken through a medicinal chemistry optimization campaign by us [45].

The remaining hits that potentiate the MMS response and cause AP site accumulation belong to structural classes typically associated with promiscuity (that is, prone to bind to multiple protein targets in the cell) or carry potentially reactive or labile functional groups. The flavonoid derivative MLS000737267, also known as galloflavin (a product derived from gallic acid oxidation), has been shown to inhibit human immunodeficiency virus integrase at a low-micromolar  $IC_{50}$  [46]. Phenanthrenes derived from orchid plant species, bearing similar chemical features to the trimethoxyphenanthrene-diol hit MLS000863573, have recently been highlighted for their anti-inflammatory activity, presumably by inhibiting the lipopolysaccharide-induced nitric oxide produc-

tion in murine macrophages [47]. Both MLS000737267 and MLS000863573 are undesirable from the standpoint of further medicinal chemistry optimization because of the polyphenolic nature. MLS000594187, which bears a resemblance to the above two hits, in that it has a core consisting of three fused 6-membered rings in a phenanthrene-like configuration, belongs to a different chemical class, benzo(c)chromen-6-ones, which has been advanced as selective estrogen receptor  $\beta$  modulators [48]. MLS001196838 was recently characterized as a potent and selective inhibitor of the histone acetyltransferase (HAT) p300, and has been employed to probe HAT's role in acute myelogenous leukemia [49,50]. A derivative of MLS001076862 has been reported as a modulator of the survival protein MCL-1, and displays cellular activity and thus potential utility for treating hyperproliferative, inflammatory, and other disorders [51]. Of note, MLS001196838 and MLS001076862 contain an exocyclic enone functionality, which may be reactive and would need to be modified prior to an extended optimization of these scaffolds. The pyrimidine-2,4,6-trione central core unit within MLS000587064 derives from barbituric acid, although this compound itself does not belong to the group of typical barbiturates. Most recently, pyrimidine-2,4,6-trione derivatives were shown to be highly effective in a protein aggregation protection assay model of amyotrophic lateral sclerosis and to possess good bioavailability [52]. Lastly, the furanyl-tetrahydromethyl-indole MLS000090966 was recently reported to be an effective inhibitor of tubulin assembly [53]. MLS000587064 and MLS000090966 contain a catechol diether moiety, a recognized chemical liability [54].

Taken together, our analyses have revealed a promising set of structurally diverse heretofore unreported APE1 inhibitors. As with all typical high-throughput screening and follow-up campaigns, it is plausible that additional APE1-inhibitory chemotypes of drug-like characteristics, which reside in our collection, may

have been missed due to the application of the series of stringent selection criteria in order to narrow down the list of hits being followed up. At present, it is hoped that the public availability of all screening and secondary assay data will lead to further exploration of this information-rich resource.

## Supporting Information

**Figure S1** Repeat AP site testing of the three hits whose combination treatments produced large standard deviations (MLS000587064, MLS000090966, and MLS000115025 in Figure 8) upon initial testing. A decrease in the standard deviation was observed for these compounds upon repeat testing, with significant difference (\* $P < 0.05$ , \*\* $P < 0.01$ ) between the combination and MMS-alone treatments obtained for MLS000587064 and MLS000115025, confirming the initially-observed enhancement trends.

(EPS)

**Table S1** HTS hits which displayed inhibition in the electrophoretic separation based assays.

(DOCX)

## Acknowledgments

We thank Sam Michael for assistance with the robotic screening and Rajarshi Guha for help with the statistical analyses.

## Author Contributions

Conceived and designed the experiments: DD DK VNV DJM AJ DMW AS. Performed the experiments: DD DK VNV. Analyzed the data: DD DK VNV DJM AJ DMW AS. Contributed reagents/materials/analysis tools: DD DK VNV DJM AJ DMW AS. Wrote the paper: DD DK VNV DJM AJ DMW AS.

## References

- Bapat A, Fishel M, Kelley MR (2009) Going Ape as an Approach to Cancer Therapeutics. *Antioxid Redox Signal* 11: 651–668.
- Kulkarni A, Wilson DM, 3rd (2008) The involvement of DNA-damage and -repair defects in neurological dysfunction. *Am J Hum Genet* 82: 539–566.
- Fortini P, Pascucci B, Parlanti E, D'Errico M, Simonelli V, et al. (2003) The base excision repair: mechanisms and its relevance for cancer susceptibility. *Biochimie* 85: 1053–1071.
- Abbotts R, Madhusudan S (2010) Human AP endonuclease 1 (APE1): from mechanistic insights to druggable target in cancer. *Cancer Treat Rev* 36: 425–435.
- Barnes DE, Lindahl T (2004) Repair and genetic consequences of endogenous DNA base damage in mammalian cells. *Annu Rev Genet* 38: 445–476.
- Karran P, Offman J, Bignami M (2003) Human mismatch repair, drug-induced DNA damage, and secondary cancer. *Biochimie* 85: 1149–1160.
- Cleaver JE (2005) Cancer in xeroderma pigmentosum and related disorders of DNA repair. *Nat Rev Cancer* 5: 564–573.
- Helleday T, Petermann E, Lundin C, Hodgson B, Sharma RA (2008) DNA repair pathways as targets for cancer therapy. *Nat Rev Cancer* 8: 193–204.
- Powell SN, Bindra RS (2009) Targeting the DNA damage response for cancer therapy. *DNA Repair (Amst)* 8: 1153–1165.
- Sharma RA, Dianov GL (2007) Targeting base excision repair to improve cancer therapies. *Mol Aspects Med* 28: 345–374.
- Wilson DM, 3rd, Barsky D (2001) The major human abasic endonuclease: formation, consequences and repair of abasic lesions in DNA. *Mutat Res* 485: 283–307.
- Fung H, Demple B (2005) A vital role for Ape1/Ref1 protein in repairing spontaneous DNA damage in human cells. *Mol Cell* 17: 463–470.
- Izumi T, Brown DB, Naidu CV, Bhakat KK, Macinnes MA, et al. (2005) Two essential but distinct functions of the mammalian abasic endonuclease. *Proc Natl Acad Sci U S A* 102: 5739–5743.
- Fishel ML, Kelley MR (2007) The DNA base excision repair protein Ape1/Ref1 as a therapeutic and chemopreventive target. *Mol Aspects Med* 28: 375–395.
- McNeill DR, Wilson DM, 3rd (2007) A dominant-negative form of the major human abasic endonuclease enhances cellular sensitivity to laboratory and clinical DNA-damaging agents. *Mol Cancer Res* 5: 61–70.
- McNeill DR, Lam W, DeWeese TL, Cheng YC, Wilson DM, 3rd (2009) Impairment of APE1 function enhances cellular sensitivity to clinically relevant alkylators and antimetabolites. *Mol Cancer Res* 7: 897–906.
- Ashworth A (2008) A synthetic lethal therapeutic approach: poly(ADP) ribose polymerase inhibitors for the treatment of cancers deficient in DNA double-strand break repair. *J Clin Oncol* 26: 3785–3790.
- Sultana R, McNeill DR, Abbotts R, Mohammed MZ, Zdzienicka MZ, et al. (2012) Synthetic lethal targeting of DNA double-strand break repair deficient cells by human apurinic/aprimidinic endonuclease inhibitors. *Int J Cancer in press*: n/a-n/a.
- Madhusudan S, Smart F, Shrimpton P, Parsons JL, Gardiner L, et al. (2005) Isolation of a small molecule inhibitor of DNA base excision repair. *Nucleic Acids Res* 33: 4711–4724.
- Seiple LA, Cardellina JH, 2nd, Akec R, Stivers JT (2008) Potent inhibition of human apurinic/aprimidinic endonuclease 1 by arylstibonic acids. *Mol Pharmacol* 73: 669–677.
- Simeonov A, Kulkarni A, Dorjsuren D, Jadhav A, Shen M, et al. (2009) Identification and characterization of inhibitors of human apurinic/aprimidinic endonuclease APE1. *PLoS ONE* 4: e5740.
- Zawahir Z, Dayam R, Deng J, Pereira C, Neamati N (2009) Pharmacophore guided discovery of small-molecule human apurinic/aprimidinic endonuclease 1 inhibitors. *J Med Chem* 52: 20–32.
- Bapat A, Glass LS, Luo M, Fishel ML, Long EC, et al. (2010) Novel small molecule inhibitor of Ape1 endonuclease blocks proliferation and reduces viability of glioblastoma cells. *J Pharmacol Exp Ther* 334: 988–998.
- Wilson III DM, Simeonov A (2010) Small molecule inhibitors of DNA repair nuclease activities of APE1. *Cell Mol Life Sci* 67: 3621–3631.
- Inglese J, Auld DS, Jadhav A, Johnson RL, Simeonov A, et al. (2006) Quantitative high-throughput screening: a titration-based approach that efficiently identifies biological activities in large chemical libraries. *Proc Natl Acad Sci U S A* 103: 11473–11478.
- Yasgar A, Shinn P, Jadhav A, Auld D, Michael S, et al. (2008) Compound Management for Quantitative High-Throughput Screening. *JALA Charlottes Va* 13: 79–89.
- Inglese J, Johnson RL, Simeonov A, Xia M, Zheng W, et al. (2007) High-throughput screening assays for the identification of chemical probes. *Nat Chem Biol* 3: 466–479.

28. Michael S, Auld D, Klumpp C, Jadhav A, Zheng W, et al. (2008) A robotic platform for quantitative high-throughput screening. *Assay Drug Dev Technol* 6: 637–657.
29. Hill AV (1910) The possible effects of the aggregation of the molecule of haemoglobin on its dissociation curves. *J Physiol(London)*. 4–7.
30. Roberts G, Myatt GJ, Johnson WP, Cross KP, Blower PE, Jr. (2000) LeadScope: software for exploring large sets of screening data. *J Chem Inf Comput Sci* 40: 1302–1314.
31. Wilson DM, 3rd, Takeshita M, Grollman AP, Demple B (1995) Incision activity of human apurinic endonuclease (Ape) at abasic site analogs in DNA. *J Biol Chem* 270: 16002–16007.
32. Wilson DM, 3rd (2005) Ape1 abasic endonuclease activity is regulated by magnesium and potassium concentrations and is robust on alternative DNA structures. *J Mol Biol* 345: 1003–1014.
33. Zhang JH, Chung TD, Oldenburg KR (1999) A Simple Statistical Parameter for Use in Evaluation and Validation of High Throughput Screening Assays. *J Biomol Screen* 4: 67–73.
34. Eastwood BJ, Farmen MW, Iversen PW, Craft TJ, Smallwood JK, et al. (2006) The Minimum Significant Ratio: A Statistical Parameter to Characterize the Reproducibility of Potency Estimates from Concentration-Response Assays and Estimation by Replicate-Experiment Studies. *J Biomol Screen* 11: 253–261.
35. Jadhav A, Ferreira R, Klumpp C, Mott BT, Austin C, et al. (2010) Quantitative Analyses of Aggregation, Autofluorescence, and Reactivity Artifacts in a Screen for Inhibitors of a Thiol Protease *J Med Chem* 53: 37–51.
36. Erzberger JP, Barsky D, Scharer OD, Colvin ME, Wilson DM, 3rd (1998) Elements in abasic site recognition by the major human and *Escherichia coli* apurinic/aprimidinic endonucleases. *Nucl Acids Res* 26: 2771–2778.
37. Mol CD, Hosfield DJ, Tainer JA (2000) Abasic site recognition by two apurinic/aprimidinic endonuclease families in DNA base excision repair: the 3' ends justify the means. *Mutat Res* 460: 211–229.
38. Heyduk T, Heyduk E (2002) Molecular beacons for detecting DNA binding proteins. *Nat Biotechnol* 20: 171–176.
39. Lea WL, Simeonov A (2011) Fluorescence Polarization Assays in Small Molecule Screening. *Expert Op Drug Disc* 6: 17–32.
40. Wyatt MD, Pittman DL (2006) Methylating agents and DNA repair responses: Methylated bases and sources of strand breaks. *Chem Res Toxicol* 19: 1580–1594.
41. Chou T-C (2006) Theoretical Basis, Experimental Design, and Computerized Simulation of Synergism and Antagonism in Drug Combination Studies. *Pharmacological Reviews* 58: 621–681.
42. Auparakkitanon S, Chapoomram S, Kuaha K, Chirachariyavej T, Wilairat P (2006) Targeting of hematin by the antimalarial pyronaridine. *Antimicrob Agents Chemother* 50: 2197–2200.
43. Naidu MD, Agarwal R, Pena LA, Cunha L, Mezei M, et al. (2011) Lucanthone and Its Derivative Hycanthone Inhibit Apurinic Endonuclease-1 (APE1) by Direct Protein Binding. *PLoS ONE* 6: e23679.
44. Shimozone N, Wada H, Biotech S (2004) Substituted Isoxazole Alkylamine Derivative and Agri- and Horticultural Fungicide. *WO/2003/074501*.
45. Rai G, Vyjayanti VN, Dorjsuren D, Simeonov A, Jadhav A, et al. (2012) Synthesis, Biological Evaluation, and Structure-Activity Relationships of a Novel Class of Apurinic/Apyrimidinic Endonuclease 1 Inhibitors. *J Med Chem* 55: 3101–3112.
46. Hong H, Neamati N, Winslow HE, Christensen JL, Orr A, et al. (1998) Identification of HIV-1 integrase inhibitors based on a four-point pharmacophore. *Antivir Chem Chemother* 9: 461–472.
47. Hwang JS, Lee SA, Hong SS, Han XH, Lee C, et al. (2010) Phenanthrenes from *Dendrobium nobile* and their inhibition of the LPS-induced production of nitric oxide in macrophage RAW 264.7 cells. *Bioorg Med Chem Lett* 20: 3785–3787.
48. Sun W, Cama LD, Birzin ET, Warriar S, Locco L, et al. (2006) 6H-Benzo[c]chromen-6-one derivatives as selective ERbeta agonists. *Bioorg Med Chem Lett* 16: 1468–1472.
49. Bowers EM, Yan G, Mukherjee C, Orry A, Wang L, et al. (2010) Virtual ligand screening of the p300/CBP histone acetyltransferase: identification of a selective small molecule inhibitor. *Chem Biol* 17: 471–482.
50. Wang L, Gural A, Sun XJ, Zhao X, Perna F, et al. (2011) The leukemogenicity of AML1-E7O is dependent on site-specific lysine acetylation. *Science* 333: 765–769.
51. Walensky LD, Stewart ML, Cohen N, Institute D-FCR (2011) Small Molecules for the Modulation of MCL-1 and Methods for Modulating Cell Death, Cell Division, Cell Differentiation, and Methods of Treating Disorders. *WPO, WO/2011/094708*.
52. Xia G, Benmohamed R, Kim J, Arvanites AC, Morimoto RI, et al. (2011) Pyrimidine-2,4,6-trione Derivatives and Their Inhibition of Mutant SOD1-Dependent Protein Aggregation. Toward a Treatment for Amyotrophic Lateral Sclerosis. *J Med Chem* 54: 2409–2421.
53. Screpanti E, Santaguida S, Nguyen T, Silvestri R, Gussio R, et al. (2010) A Screen for Kinetochore-Microtubule Interaction Inhibitors Identifies Novel Antitubulin Compounds. *PLoS ONE* 5: e11603.
54. Rishton GM (1997) Reactive compounds and in vitro false positives in HTS. *Drug Discovery Today* 2: 382–384.
